1                   **Nonmedical Masks in Public for Respiratory Pandemics:**  
2                   **Droplet Retention by Two-Layer Textile Barrier Fully Protects**  
3                   **Germ-free Mice from Bacteria in Droplets**

4  
5                   Alex Rodriguez-Palacios, DVM PhD<sup>1,2\*</sup> Mathew Conger, BSc<sup>1,2</sup>, Fabio Cominelli, MD PhD<sup>1,2</sup>

6  
7                   <sup>1</sup>Division of Gastroenterology & Liver Diseases, Case Western Reserve University School of  
8                   Medicine and <sup>2</sup>Digestive Health Research Institute, University Hospitals Cleveland Medical Center,  
9                   Cleveland, OH, USA.

10  
11                   **\*Corresponding Author:** Alex Rodriguez-Palacios ([axr503@case.edu](mailto:axr503@case.edu))

12  
13                   **Keywords:** Coronavirus, respiratory pandemic, COVID-19, SARS-Cov-2, Cloth Masks, Fabrics  
14                   **Availability of data and materials.** The raw data supporting the conclusions of this article will be  
15                   made available by the authors, without undue reservation.

16                   **Competing interests.** The authors declare that they have no competing interests.

17                   **Funding:** This study was conducted with discretionary funds allocated to ARP.

18                   **Author contributions.** ARP envisioned, planned and executed the experiments, analyzed the data,  
19                   prepared figures and wrote the manuscript. MC, assisted with experiments. FC commented, revised  
20                   and edited the manuscript. All authors approved the final manuscript.

21                   **Acknowledgements.** Special thanks to the Animal Resource Center at Case Western Reserve  
22                   University and Gina Ponzani for assistance with animal husbandry; Dr. Abigail Basson for  
23                   proofreading and editorial/scientific suggestions; and Drs. Minh Lam, W. John Durfee, and Kristie  
24                   Brock for assistance with animal utilization protocol and advice relevant to animal housing and  
25                   study authorization by IACUC.

26  
27                   **Text words:** 1250

28                   **Figures:** 1

## 29 **ABSTRACT**

30 Due to the shortage of masks during the pandemic, we recently demonstrated that household  
31 textiles are effective environmental droplet barriers (EDBs) with identical droplet retention  
32 potential as medical masks. To further promote the implementation of a *universal community*  
33 *droplet reduction solution* based on a synchronized encouragement/enforcement of mask utilization  
34 by the public based on widely available textiles (mask fabrication without the need for sewing  
35 machines), here we conducted a study using germ-free mice to determine to what extent textiles  
36 were effective *in vivo*. Using a bacterial-suspension spray simulation model of droplet ejection  
37 (mimicking a sneeze), we quantified the extent by which 100% cotton textile prevented the  
38 contamination of germ-free animals on the other side of the textile-barrier (simulating a properly  
39 worn mask). Of relevance, all mice protected with textiles remained germ-free after two sprays  
40 (inoculation dose: >600 bacterial droplet units per 56.75cm<sup>2</sup>) compared to the contamination of  
41 mice not protected by a textile (0/12 vs 6/6, Fisher's exact, p<0.0001). In a second phase of the  
42 experiment with 12 germ-free mice exposed again to 10-fold more droplets remained germ-free,  
43 while 100% of mice at 180cm became colonized with a single spray (0/8 vs 4/4, Fisher exact,  
44 p=0.002). Collectively, barriers protected all mice (even with low-density textiles, heavy vs. light  
45 fabric, T-test, p=0.0028) when using textile-EDB to cover the cages (0/20 vs 10/10, Fisher exact,  
46 p<0.0001). This study demonstrated, *in vivo*, that widely available household textiles are 100%  
47 effective at preventing contamination of the environment and the exposed animals by microbe-  
48 carrying droplets.

## 49 **INTRODUCTION**

50 The economic impact of the COVID-19 respiratory syndrome, declared a pandemic on  
51 March 11, 2020, with a doubling time between 2.4 and 5.1 days<sup>1</sup>, will disproportionately affect poor  
52 communities<sup>2</sup>. Especially, because lower income individuals have limited resources/access to  
53 health-care services, and importantly, because many of these individuals believe that masks are  
54 'bad' as they 'increase the risk of COVID19', as a consequence of the earlier misleading expert  
55 statements and guidelines released to protect the global shortage of medical supplies for hospitals<sup>3-5</sup>.  
56 High-exposure risks could also be compounded by limited access to education and income during  
57 the crisis<sup>6</sup> especially among low income 'lockdown' communities.

58 Since COVID-19 transmits primarily via droplet dispersion from  
59 symptomatic/asymptomatic individuals as they talk/cough/sneeze<sup>7</sup>, the use of mandatory homemade  
60 masks to prevent the contamination of the environment with potentially infective droplets, initially  
61 discouraged, has been discussed for voluntary implementation<sup>3-5</sup>. Of interest, the use of masks to  
62 prevent droplet dispersion has not been considered as a mandatory strategy, as it has been other  
63 measures (*e.g.*, orders to forbid non-essential surgeries<sup>8</sup>) to control COVID transmission by global  
64 health directives<sup>9</sup>. At most, some governments started to allow, contradicting initial  
65 recommendations, the voluntary use of homemade masks in the community. However, the  
66 benefits/implementation of using masks are still debated, with arguments stating that cloths 'masks  
67 increase the risk'. However, such statement is not quantitatively possible if compared to 'not-  
68 wearing masks'.  
69

70 Because the voluntary use of masks within the community is expected to cause social  
71 polarization (believers vs. non-believers; including presidential leaders<sup>10</sup>), if not made mandatory,  
72 there is need of further convincing evidence of the ‘mask-wearing’ benefits to incentive their use in  
73 public. To prevent the contamination of the environment with COVID-19 droplets, as a  
74 continuation of previous studies in masks<sup>11</sup>, and to promote effective education/communication  
75 initiatives, herein, we conducted studies using animals born and maintained for life with no germs  
76 (germ-free) to determine how effective household textiles are as barriers to protect against microbes  
77 inside the droplets.

## 78 79 **METHODS**

80 All respiratory viruses need liquid suspensions/droplets to remain infective for long periods  
81 of time (vs. dry), and to contaminate susceptible individuals<sup>12</sup>. Therein, using a bacterial-suspension  
82 spray simulation model of droplet ejection (mimicking a sneeze)<sup>11</sup>, and a Parallel Lanes Plating  
83 method<sup>13</sup>, herein we quantified the extent by which widely available clothing fabrics could protect  
84 germ-free animals on the other side of the textile-barrier (simulating a properly worn mask) from  
85 contamination by the microbes contained in micro-droplets. In short, the reported experiment was  
86 conducted with eighteen 9-week-old germ-free (Swiss Webster) mice (males:females, 1:1), which  
87 were individually allocated to 18 germ-free cages, for repeated exposure to a cloud of micro-  
88 droplets.

89 To test the textile barrier as an effective surrogate alternative simulating a medical mask, we  
90 used two layers of a widely common household textile (100% combed-cotton, T-shirts) as cage  
91 lid/cover, instead of using the standard germ-free grade mouse cage lids<sup>14</sup>. The choice of textile  
92 material was based on their recently proven effect in retaining droplets<sup>11</sup>. Our earlier studies have  
93 also shown that two layers of passive filtration are fully protective against viruses/microbes in the  
94 room air, when germ-free mice are raised under two-layer of such nested filtration<sup>14</sup>. To determine  
95 the extent by which the textile droplet barrier could protect GF mice from droplets, and conduct a  
96 statistical powerful study, we exposed to the droplets all animals at a ratio of 2 exposed with EDB:1  
97 without EDB. Animals were observed for three days when fecal cultures were conducted to  
98 determine whether animals had been colonized by the bacteria present in the droplet solution used  
99 to spray the cages. To further test repeated higher droplet exposure doses, in a second phase of  
100 experiment, all animals with EDB that remained germ-free, were exposed again with the textile  
101 EDB cover, to 20-sprays (instead of 2; 10-times more droplets) at 60cm, and compared that to  
102 animals that were uncovered, and received a single spray-droplet dose at 180cm (minimum social  
103 distance recommended; see method details in [Supplementary Materials](#)).

## 104 105 **RESULTS**

106 Microbiological analysis of the germ-free status of the mice, before and after two rounds of  
107 spray-droplet exposure in the first phase of the experiment, showed that all animals after being  
108 sprayed with a cloud of droplets at 60cm (inoculation dose: 600-1000 bacterial droplet units per  
109 56.75cm<sup>2</sup>), with no textile protection (simulating not wearing a mask) showed signs of microbial  
110 contamination within 18h (fecal culture), by either exposure to the droplets in the environment, or  
111 by inhalation, ingestion, or exposure to the droplets on mucous membranes. In contrast, the germ-

112 free status of the mice that were covered with the autoclaved textile EDB, remained germ-free three  
113 days after exposure indicating that the textile barrier was extremely effective at retaining bacteria  
114 carrying droplets, reducing thus the absolute contamination risk (0/12 vs 6/6, Fisher's exact,  
115  $p < 0.0001$ ).

116 The second phase of the experiment (repeated exposure with 10-times more droplets), with  
117 12 germ-free mice, showed that the textile-EDB maintained all animals germ-free, even after 20  
118 droplet sprays at 60cm, while mice located at 180cm became colonized by bacteria-carrying  
119 droplets with a single spray (0/8 vs 4/4, Fisher's exact,  $p = 0.002$ ). Collectively, barriers protected  
120 all mice (even with low textile density; heavy vs light fabric, paired t-test,  $p = 0.002$ ) against high  
121 droplet doses (2 or 20 sprays) if the EDB fully covered the cage (0/20 vs 10/10, Fisher's exact,  
122  $p < 0.0001$ ). An overview of the experiment, methods and results is presented in **Figure 1** and  
123 **Supplementary Figures 1-2**).  
124

## 125 DISCUSSION

126 As illustrated though the media, the ongoing increase in coronavirus cases has “sparked a  
127 ‘war of masks’ in desperate global scramble for protection”<sup>15</sup>. Despite the seriousness of the mask  
128 supply shortage, global institutions have not promoted the mandatory use of homemade masks to  
129 prevent COVID expansion and to simultaneously alleviate pressure on medical-grade supplies.

130 As the main measure to control COVID transmission, virtually everyone in all continents  
131 has been requested to ‘stay-at-home’ by lawful orders, and enforcement. Despite such  
132 unprecedented, effective global initiative, combined with social distancing (1.8m) as preventive  
133 behavior, it is expected that indefinite quarantine may not be sustainable, especially within highly  
134 populated and poor regions (currently in their pre-pandemic curve phase). Our results with a single  
135 spray towards mice located at 1.8m showed that 100% of mice can get contaminated if not  
136 protected with a textile-barrier/mask.

137 To date, masks have been studied primarily in health care settings and under conditions that  
138 are not as publicized or feared as the consequences of the COVID pandemic. Transmitted primarily  
139 by oral-respiratory droplets, the COVID-19 pandemic would benefit if the scientists, policymakers,  
140 medical advisors, and community have further scientific data to demonstrate that masks are  
141 effective to prevent droplet dispersion, while fully protecting individuals from exposure to  
142 microbial agents present in the droplets, if masks are properly worn.

143 This brief report illustrates that germ-free animals when protected by two layers of textile  
144 (100% combed cotton, simulating medical mask protection) are fully protected from becoming  
145 contaminated with the germs present with a simulated cloud model of bacteria-carrying droplets. In  
146 this context, although several studies have shown that masks are effective preventing respiratory  
147 infections in humans, masks often fail because often 50% of times people in such settings do not  
148 wear them properly<sup>16,17</sup>. This study supports the effective prevention potential of homemade masks  
149 rapidly fabricated using widely available cotton fabrics<sup>18</sup>. The U.S. Centers for Disease Control  
150 now provides guidance for sewn and non-sewn versions. In addition, the U.S. Surgeon General  
151 released a 45-second video with his own tutorial<sup>19</sup>. A mandatory recommendation to wear EDB-  
152 textile masks at a global scale will effectively help protect individuals from COVID droplets.

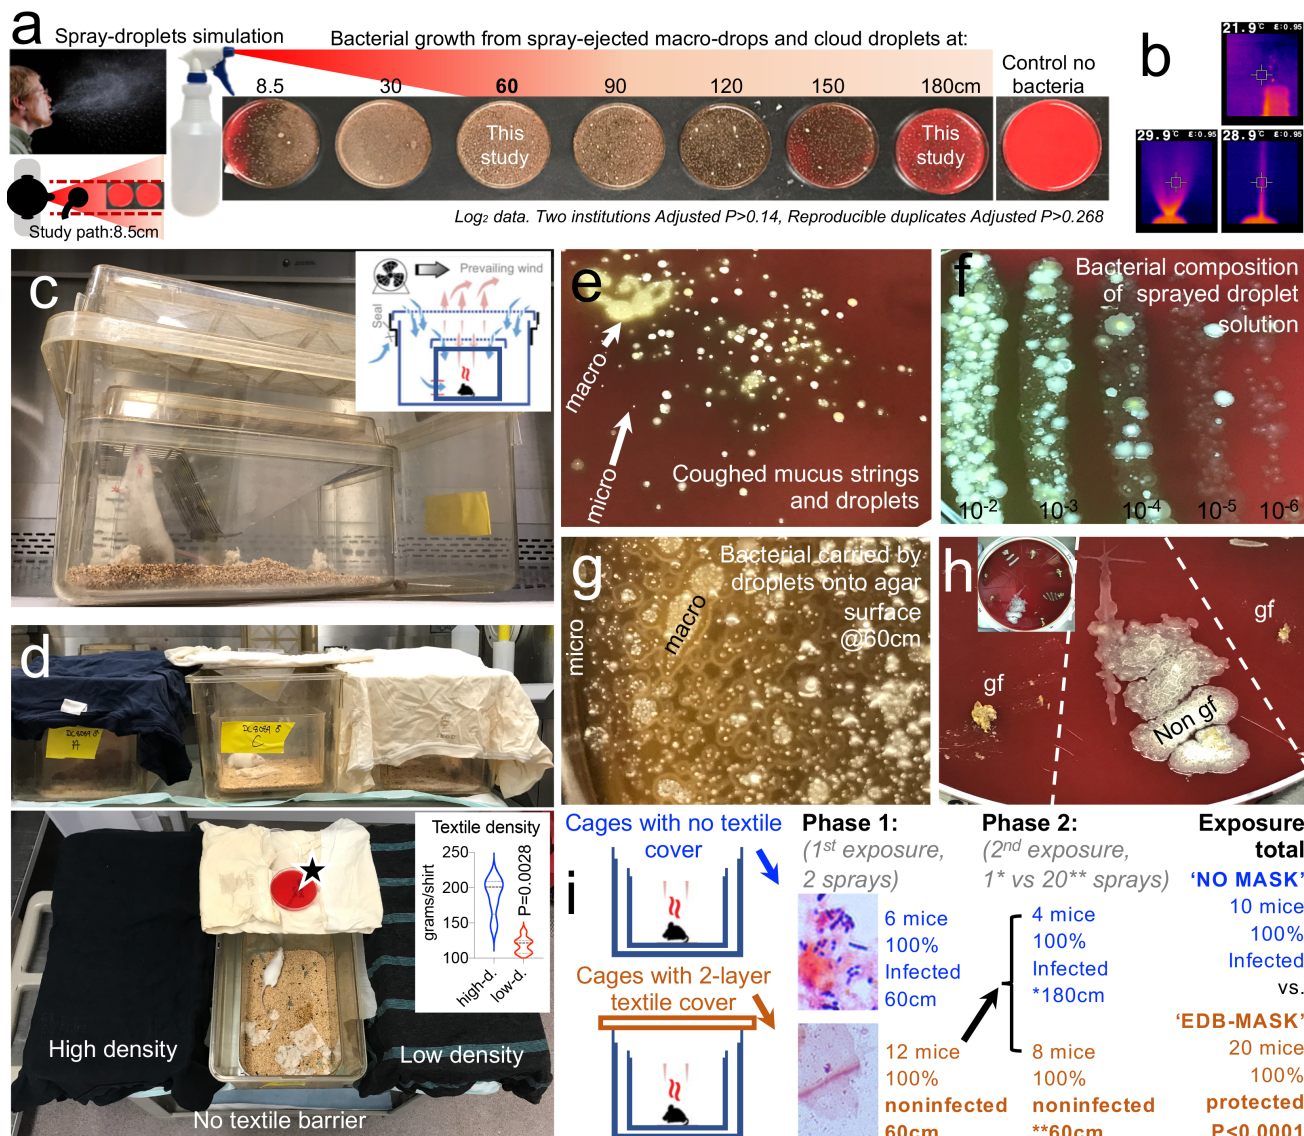

153  
154 **Figure 1. A two-layer textile barrier fully protects germ-free mice from colonization by**  
155 **bacteria contained in sprayed micro-droplets.** a) Spray-droplet simulation model using bacterial  
156 aqueous solution recently validated for the assessment of textiles against COVID-19 in our  
157 laboratory. Unmodified from by Rodriguez-Palacios *et al.*<sup>11</sup>; open access license. Inset, mechanism  
158 of passive filtration. b) Thermographic features of cloud-droplet ejection. c) Nested isolation caging  
159 2-layer system used to raise germ-free mice. d) In this experiment, the two cage lids were replaced  
160 by a two-layer textile barrier to prevent EnvDC within the cage. Compared with cages without lid  
161 (no mask, surrogate). Sprayed from 60 and 180cm distance. e) Visualization of bacteria present in  
162 cough microdroplets, healthy adult. TSA plates, aerobic incubation, 48h. f) Visualization of rich  
163 community composition for the bacteria present in the microdroplet solution used to spray germ-  
164 free mice. Parallel lanes plating method<sup>13</sup>. g) Visualization of bacteria-contained on macro/micro-  
165 droplets on a quarter of a Petri dish. TSA, 21mm horizontal field. h) Example of fecal culture-  
166 negative from mice protected with textile-EDBs, which remained germ-free (gf), and culture-  
167 positive from mice not protected with textile (Non gf), Inset, 20cm plate, 8 samples. i) Overview of  
168 experiment, results, and fecal gram-stain confirmation (details in **Supplementary Materials**).

169 **REFERENCES**

- 170
- 171 1 Bedford, T. *et al.* Cryptic transmission of SARS-CoV-2 in Washington State. medRxiv  
172 2020.04.02.20051417; doi: <https://doi.org/10.1101/2020.04.02.20051417> (2020).
- 173 2 Mansor, S. Data Suggests Many New York City Neighborhoods Hardest Hit by COVID-19  
174 Are Also Low-Income Areas. Time. Available at: [https://time.com/5815820/data-new-york-](https://time.com/5815820/data-new-york-low-income-neighborhoods-coronavirus/)  
175 [low-income-neighborhoods-coronavirus/](https://time.com/5815820/data-new-york-low-income-neighborhoods-coronavirus/). April 5, 2020. (2020).
- 176 3 Dwyer, C. & Aubrey, A. CDC Now Recommends Americans Consider Wearing Cloth Face  
177 Coverings In Public. NPR. Coronavirus crisis. Updated. April 3, 2020. Available at:  
178 [https://www.npr.org/sections/coronavirus-live-updates/2020/04/03/826219824/president-](https://www.npr.org/sections/coronavirus-live-updates/2020/04/03/826219824/president-trump-says-cdc-now-recommends-americans-wear-cloth-masks-in-public)  
179 [trump-says-cdc-now-recommends-americans-wear-cloth-masks-in-public](https://www.npr.org/sections/coronavirus-live-updates/2020/04/03/826219824/president-trump-says-cdc-now-recommends-americans-wear-cloth-masks-in-public) (2020).
- 180 4 Howard, J. Masks may actually increase your coronavirus risk if worn improperly, surgeon  
181 general warns. CNN. Updated. March 2, 2020. Available at:  
182 [https://www.cnn.com/2020/03/02/health/surgeon-general-coronavirus-masks-risk-](https://www.cnn.com/2020/03/02/health/surgeon-general-coronavirus-masks-risk-trnd/index.html)  
183 [trnd/index.html](https://www.cnn.com/2020/03/02/health/surgeon-general-coronavirus-masks-risk-trnd/index.html). (2020).
- 184 5 Howard, J. WHO stands by recommendation to not wear masks if you are not sick or not  
185 caring for someone who is sick.CNN. Updated. March 31, 2020. Available at:  
186 [https://www.cnn.com/2020/03/30/world/coronavirus-who-masks-recommendation-](https://www.cnn.com/2020/03/30/world/coronavirus-who-masks-recommendation-trnd/index.html)  
187 [trnd/index.html](https://www.cnn.com/2020/03/30/world/coronavirus-who-masks-recommendation-trnd/index.html). (2020).
- 188 6 Purohit, K. India COVID-19 lockdown means no food or work for rural poorMillions in  
189 underdeveloped regions face penury and deprivation as economic activity grinds to a halt  
190 due to lockdown. News/poverty and development. Available at:  
191 [https://www.aljazeera.com/news/2020/04/india-covid-19-lockdown-means-food-work-rural-](https://www.aljazeera.com/news/2020/04/india-covid-19-lockdown-means-food-work-rural-poor-200402052048439.html)  
192 [poor-200402052048439.html](https://www.aljazeera.com/news/2020/04/india-covid-19-lockdown-means-food-work-rural-poor-200402052048439.html). 3 Apr 2020. (2020).
- 193 7 Asadi, S. *et al.* Aerosol emission and superemission during human speech increase with  
194 voice loudness. *Sci Rep* **9**, 2348, doi:10.1038/s41598-019-38808-z (2019).
- 195 8 Borowicz, S. A., Plinke, E. & Cahill, T. Ohio Department Of Health Orders Cancellation of  
196 All Non-Essential Surgeries to Preserve PPE. Wednesday, March 18, 2020. Available at  
197 [https://www.natlawreview.com/article/ohio-department-health-orders-cancellation-all-non-](https://www.natlawreview.com/article/ohio-department-health-orders-cancellation-all-non-essential-surgeries-to-preserve)  
198 [essential-surgeries-to-preserve](https://www.natlawreview.com/article/ohio-department-health-orders-cancellation-all-non-essential-surgeries-to-preserve). Accessed March 19, 2020. (2020).
- 199 9 WHO. World Health Organization. Coronavirus disease (COVID-19) advice for the public:  
200 When and how to use masks. Available at:  
201 [https://www.who.int/emergencies/diseases/novel-coronavirus-2019/advice-for-public/when-](https://www.who.int/emergencies/diseases/novel-coronavirus-2019/advice-for-public/when-and-how-to-use-masks)  
202 [and-how-to-use-masks](https://www.who.int/emergencies/diseases/novel-coronavirus-2019/advice-for-public/when-and-how-to-use-masks). Accessed March 18, 2020. (2020).
- 203 10 BBC. Coronavirus: Trump to defy 'voluntary' advice for Americans to wear masks. BBC.  
204 Updated. April 4, 2020. Available at: [https://www.bbc.com/news/world-us-canada-](https://www.bbc.com/news/world-us-canada-52161529)  
205 [52161529](https://www.bbc.com/news/world-us-canada-52161529). (2020).
- 206 11 Rodriguez-Palacios, A., Cominelli, C., Basson, A., Pizarro, T. & Ilic, S. Textile Masks and  
207 Surface Covers – A ‘Universal Droplet Reduction Model’ Against COVID-19 Respiratory  
208 Pandemic. Submitted to medrxiv March 29, 2020. DOI pending. (2020).
- 209 12 Liu, Y. *et al.* Aerodynamic Characteristics and RNA Concentration of SARS-CoV-2  
210 Aerosol in Wuhan Hospitals during COVID-19 Outbreak/. bioRxiv 2020.03.08.982637; doi:  
211 <https://doi.org/10.1101/2020.03.08.982637> (2020).
- 212 13 Rodriguez-Palacios, A. *et al.* The artificial sweetener Splenda promotes gut Proteobacteria,  
213 dysbiosis and myeloperoxidase reactivity in Crohn's disease-like ileitis. *Inflammatory Bowel*  
214 *Diseases, Accepted, In press.* (2018).

- 215 14 Rodriguez-Palacios, A. *et al.* 'Cyclical Bias' in Microbiome Research Revealed by A  
216 Portable Germ-Free Housing System Using Nested Isolation. *Sci Rep* **8**, 3801,  
217 doi:10.1038/s41598-018-20742-1 (2018).
- 218 15 Lister, T., Shukla, S. & Bobille, F. CNN - Coronavirus sparks a 'war for masks' in desperate  
219 global scramble for protection. Updated 1:43 PM ET, Sat April 4, 2020. Available at  
220 <https://www.cnn.com/2020/04/04/europe/coronavirus-masks-war-intl/index.html>. (2020).
- 221 16 MacIntyre, C. R. *et al.* Face mask use and control of respiratory virus transmission in  
222 households. *Emerg Infect Dis* **15**, 233-241, doi:10.3201/eid1502.081167 (2009).
- 223 17 MacIntyre, C. R. & Chughtai, A. A. Facemasks for the prevention of infection in healthcare  
224 and community settings. *BMJ* **350**, h694, doi:10.1136/bmj.h694 (2015).
- 225 18 CDC. Use of Cloth Face Coverings to Help Slow the Spread of COVID-19. Coronavirus  
226 Disease 2019 (COVID-19). April 4, 2020. Uso de cubiertas de tela para la cara para ayudar  
227 a desacelerar la propagación del COVID-19. Available at  
228 [https://www.cdc.gov/coronavirus/2019-ncov/prevent-getting-sick/diy-cloth-face-](https://www.cdc.gov/coronavirus/2019-ncov/prevent-getting-sick/diy-cloth-face-coverings.html)  
229 [coverings.html](https://www.cdc.gov/coronavirus/2019-ncov/prevent-getting-sick/diy-cloth-face-coverings.html). . (2020).
- 230 19 Adams, J. Surgeon General Shows How to Make Your Own Face Covering. Surgeon  
231 General Dr. Jerome Adams. Tutorial April 4, 2020. Available at  
232 <https://www.youtube.com/watch?v=PI1GxNjAjlw>. (2020).

233  
234

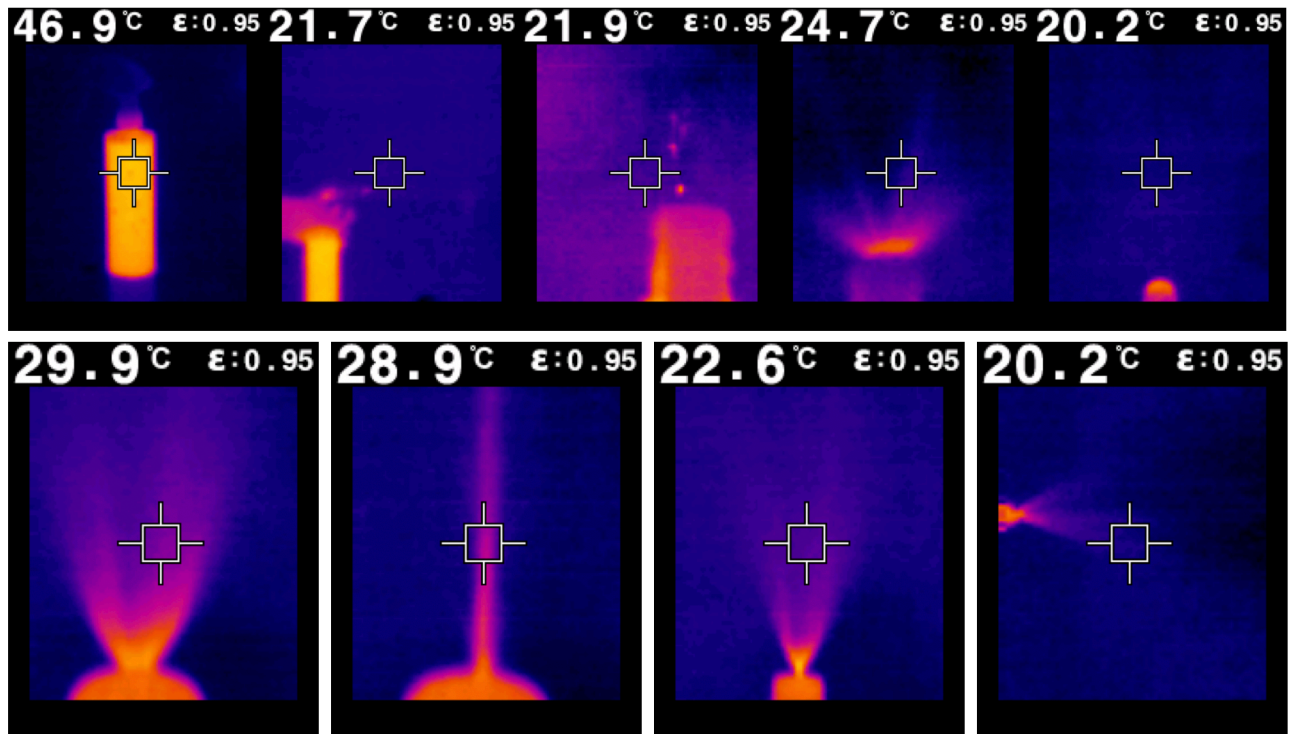

235  
236 **Supplementary Figure 1. Thermographic characterization of ejection features of our spray**  
237 **macro- and micro-droplet model.** Notice the warm liquid solution used (at 46.9oC, rapidly cools  
238 down upon ejection as spray. Also note that the complexity of our simulation model resembles the  
239 features of the sneeze fluid dynamics as described by Bourouiba *et al.*<sup>1</sup>, with wide dispersion of  
240 high-velocity microdroplets, splashing of large heavy macro-droplets, and long range projectile-like  
241 jet, covering a large conical surface for cloud surface contamination.



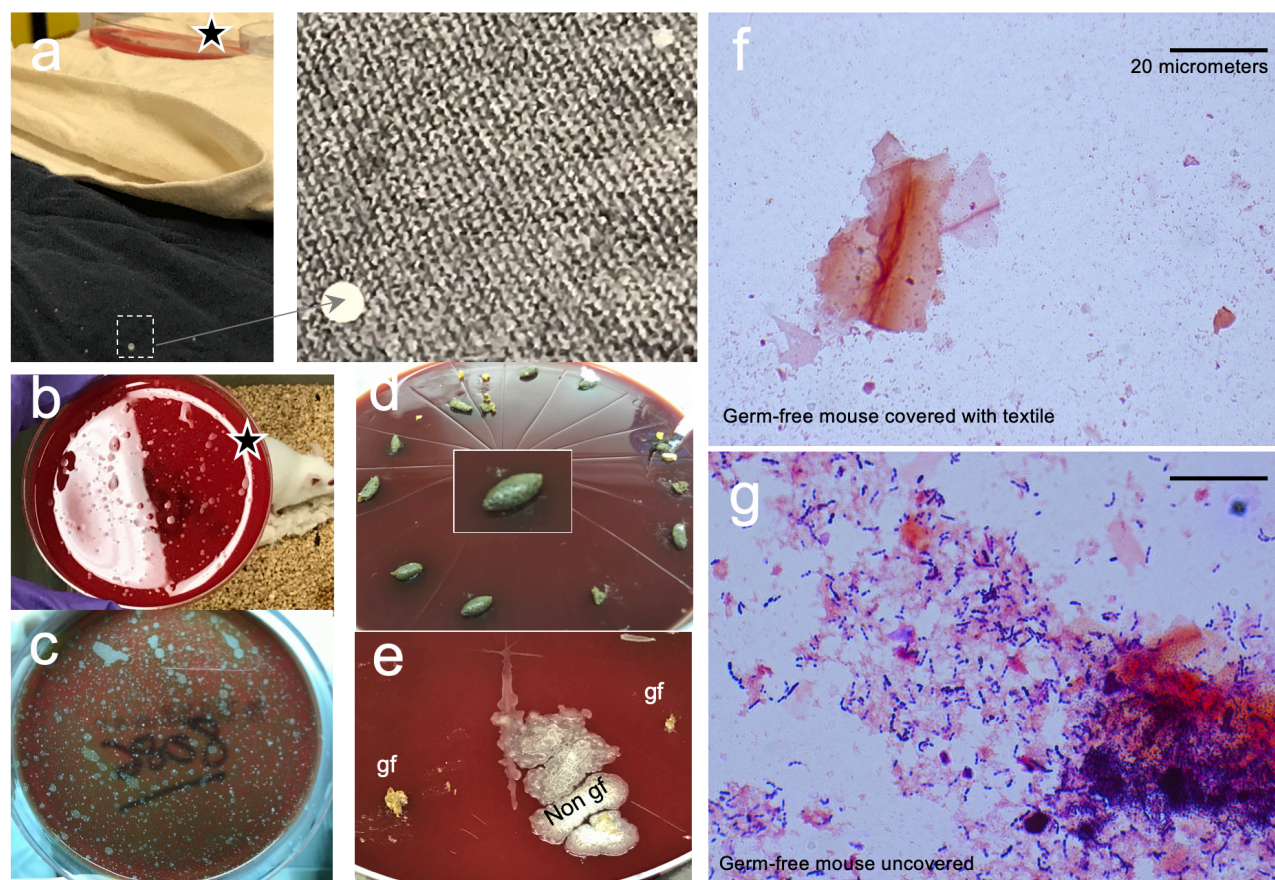

242  
243 **Supplementary Figure 2. Textile Droplet Barrier fully protect germ-free mice from microbial**  
244 **colonization by bacteria present in sprayed liquid micro-droplets. a)** Textiles were able to retail  
245 large drops and microdroplets. **b)** Agar plate shows droplet density to which mice were exposed  
246 immediately after spray (stars). **c)** Aerobic incubation of agar illustrates environmental  
247 contamination of mouse cage with numerous microdroplets not visualized immediately after spray.  
248 **d)** Fecal samples from all mice show no bacterial growth after 36h of incubation on agar before  
249 experiment confirming Germ-free status of mice. **e)** Fecal samples from representative mice  
250 protected with textile showing no bacterial growth after 36h of incubation on agar after spray  
251 confirming Germ-free status protection by the textile, and no-barrier mice showing fecal bacterial  
252 growth. **f-g)** Representative gram stain of fecal samples in this study shown as insets in **Figure 1i**.
